# Supplementary material for: A Metaheuristic Algorithm for Flexible Energy Storage Management in Residential Electricity Distribution Grids
Source: Preprints.org preprint supplement (doi:10.20944/preprints202109.0090.v1), 2021-09-06
Supplement: Supplementary file 1 [file supplementary]

## Sheet: Consumer data
				Consumption, kWh
No.	Pole index	Consumer code	Connection phase	h01	h02	h03	h04	h05	h06	h07	h08	h09	h10	h11	h12	h13	h14	h15	h16	h17	h18	h19	h20	h21	h22	h23	h24
1	1	1	c	0.025	0.074	0.11	0.15	0.085	0.074	0.149	0.085	0.132	0.091	0.031	0.059	0.079	0.045	0.075	0.1	0.09	0.222	0.146	0.28	0.215	0.185	0.037	0.048
2	91	2	b	0.117	0.118	0.117	0.117	0.118	0.139	0.143	0.004	0.003	0.022	0.008	0.003	0.004	0.016	0.003	0.004	0.004	0.01	0.248	0.277	0.181	0.141	0.114	0.115
3	92	3	c	0.117	0.118	0.117	0.117	0.118	0.139	0.143	0.004	0.003	0.022	0.008	0.003	0.004	0.016	0.003	0.004	0.004	0.01	0.248	0.277	0.181	0.141	0.114	0.115
4	5	4	a	0	0	0	0	0	0	0	0	0	0	0	0	0	0	0	0	0	0	0	0	0	0	0	0
5	94	5	b	0	0	0	0	0	0	0	0	0	0	0	0	0	0	0	0	0	0	0	0	0	0	0	0
6	9	6	a	0	0	0	0	0	0	0	0.001	0.007	0.048	0.027	0.022	0	0.04	0.111	0.04	0.064	0.074	0.046	0.045	0.041	0.004	0	0.001
7	11	7	b	0	0	0	0	0	0	0	0	0	0	0	0	0	0	0	0	0	0	0	0	0	0	0	0
8	95	8	a	0.017	0.017	0.017	0.017	0.041	0.084	0.188	0.045	0.084	0.131	0.118	0.058	0.048	0.087	0.074	0.07	0.076	0.065	0.097	0.193	0.08	0.066	0.027	0.003
9	16	9	b	0.011	0.035	0.01	0.035	0.01	0.034	0.011	0.114	0.033	0.071	0.09	0.073	0.038	0.038	0.048	0.13	0.01	0.161	0.131	0.132	0.053	0.038	0.01	0.035
10	17	10	c	0	0	0	0	0	0	0	0	0	0	0	0	0	0	0	0	0	0	0	0	0	0	0	0
11	18	11	c	0.012	0.012	0.011	0.001	0.012	0.012	0.001	0.01	0.012	0.012	0	0.012	0.012	0.009	0.003	0.012	0.012	0	0.011	0.012	0.008	0.004	0.012	0.012
12	18	12	c	0.127	0.122	0.123	0	0.207	0.119	0.088	0.018	0.015	0.042	0.057	0.098	0.161	0.328	0.947	1.024	0.995	0.508	0.874	0.206	0.274	0.267	0.106	0.119
13	19	13	a	0	0	0	0	0	0	0	0	0	0	0	0	0	0	0.021	0.177	0	0	0	0	0	0	0	0
14	21	14	c	0.055	0.073	0.048	0.08	0.042	0.083	0.039	0.083	0.044	0.087	0.074	0.109	0.056	0.071	0.065	0.044	0.826	0.445	0.124	0.086	0.098	0.105	0.076	0.088
15	96	15	a	0.044	0.037	0.031	0.095	0.117	0.186	0.138	0.204	0.104	0.114	0.038	0.177	0.269	0.124	0.099	0.163	0.257	0.184	0.219	0.182	0.148	0.104	0.047	0.028
16	22	16	a	0	0	0	0	0	0	0	0	0	0	0	0	0	0	0	0	0	0	0	0	0	0	0	0
17	97	17	c	0	0	0	0	0	0	0	0	0	0	0	0	0	0	0.011	0	0	0	0	0	0	0	0	0
18	23	18	c	0.036	0.022	0.02	0.021	0.02	0.021	0.079	0.076	0.06	0.019	0.018	0.053	0.07	0.077	0.07	0.02	0.116	0.18	0.14	0.144	0.154	0.141	0.133	0.07
19	23	19	a	0.006	0.006	0.021	0.006	0.006	0.007	0.006	0.005	0.006	0.006	0.006	0.006	0.005	0.005	0.006	0.012	0.059	0.062	0.02	0.005	0.006	0.006	0.006	0.006
20	98	20	b	0.093	0.059	0.079	0.071	0.065	0.112	0.111	0.154	0.102	0.09	0.094	0.071	0.094	0.051	0.104	0.073	0.126	0.16	0.119	0.113	0.122	0.1	0.06	0.044
21	99	21	a	0	0	0	0	0	0	0	0	0	0	0	0	0	0	0	0	0	0	0	0	0	0	0	0
22	25	22	b	0.036	0.034	0.032	0.032	0.03	0.033	0.036	0.044	0.047	0.049	0.051	0.049	0.047	0.047	0.048	0.049	0.033	0.035	0.042	0.046	0.045	0.051	0.04	0.046
23	25	23	a	0.005	0.004	0.004	0.004	0.004	0.029	0.079	0.673	0.055	0.052	0.051	0.053	0.02	0.005	0.058	0.517	0.053	0.053	0.092	0.091	0.05	0.054	0.061	0.048
24	25	24	a	0.089	0.045	0.038	0.07	0.039	0.039	0.017	0.038	0.049	0.013	0.039	0.016	0.039	0.016	0.051	0.086	0.066	0.092	0.06	0.069	0.086	0.066	0.093	0.062
25	26	25	b	0.079	0.048	0.021	0.06	0.11	0.13	0.128	0.022	0.004	0.005	0.004	0.011	0.065	0.024	0.005	0.004	0.005	0.075	0.16	0.039	0.026	0.026	0.012	0.041
26	26	26	b	0.042	0.011	0.044	0.03	0.01	0.071	0.137	0.137	0.112	0.078	0.084	0.12	0.057	0.101	0.062	0.103	0.059	0.076	0.132	0.115	0.043	0.024	0.009	0.05
27	27	27	a	0.0254	0.0234	0.0198	0.0193	0.0191	0.0218	0.0315	0.0441	0.051	0.049	0.0517	0.045	0.0494	0.0465	0.0457	0.046	0.0466	0.05	0.057	0.0657	0.0648	0.0562	0.0413	0.03
28	27	28	a	0.14	0.176	0.143	0.174	0.158	0.158	0.115	0.029	0.071	0.148	0.199	0.103	0.185	0.948	0.808	0.197	0.163	0.235	0.148	0.064	0.052	0.068	0.026	0.028
29	27	29	c	0.02854	0.02492	0.0234	0.02212	0.02097	0.02316	0.02739	0.03425	0.04346	0.0467	0.04565	0.04582	0.04584	0.0475	0.04639	0.04856	0.04659	0.04797	0.05398	0.05887	0.06486	0.06553	0.05063	0.0369
30	28	30	a	0.074	0.04	0.021	0.02	0.061	0.047	0.106	0.24	0.19	0.104	0.192	0.099	0.086	0.108	0.133	0.13	0.135	0.352	0.249	0.267	0.214	0.092	0.017	0.037
31	28	31	a	0	0	0	0	0	0	0	0	0	0	0	0	0	0	0	0	0	0	0	0	0	0	0	0
32	31	32	c	0	0	0	0	0	0	0	0	0	0	0	0	0	0	0	0	0	0	0	0	0	0	0	0
33	32	33	b	0	0	0	0	0	0	0	0	0	0	0	0	0	0	0	0	0	0	0	0	0	0	0	0
34	33	34	a	0	0	0	0	0	0	0	0	0	0	0	0	0	0	0	0	0	0	0	0	0	0	0	0
35	33	35	b	0	0	0	0	0	0	0	0	0	0	0	0	0	0	0	0	0	0	0	0	0	0	0	0
36	34	36	c	0	0	0	0	0	0	0	0	0	0	0	0	0	0	0	0	0	0	0	0	0	0	0	0
37	100	37	a	0	0	0	0	0	0	0	0	0	0	0	0	0	0	0	0	0	0	0	0	0	0	0	0
38	35	38	a	0.032	0.004	0.004	0.004	0.023	0.025	0.004	0.004	0.033	0.143	0.137	0.027	0.013	0.01	0.018	0.017	0.006	0.018	0.004	0.019	0.004	0.019	0.004	0.021
39	35	39	b	0.156	0.185	0.236	0.193	0.072	0.101	0.082	0.129	0.19	0.236	0.13	0.111	0.134	0.155	0.288	0.134	0.128	0.18	0.285	0.466	0.475	0.43	0.224	0.093
40	35	40	a	0.012	0.012	0.012	0.019	0.013	0.044	0.063	0.033	0.011	0.012	0.025	0.033	0.051	0.059	0.057	0.057	0.054	0.065	0.163	0.174	0.07	0.06	0.06	0.026
41	102	41	c	0.161	0.158	0.158	0.158	0.208	0.22	0.194	0.17	0.156	0.156	0.158	0.175	0.16	0.186	0.184	0.217	0.223	0.167	0.204	0.207	0.19	0.184	0.18	0.164
42	103	42	a	0	0	0	0	0	0	0	0	0	0	0	0	0	0	0	0	0	0	0	0	0	0	0	0
43	36	43	c	0.028	0	0.036	0.106	0.148	0.158	0.196	0.142	0.068	0.07	0.073	0.075	0.067	0.066	0.072	0.082	0.091	0.181	0.237	0.215	0.23	0.246	0.129	0.048
44	37	44	c	0.306	0.235	0.26	0.261	0.204	0.264	0.266	1.169	0.297	0.216	0.276	0.35	0.334	0.317	1.167	0.332	0.344	0.381	0.585	1.118	1.92	0.451	1.324	0.349
45	104	45	c	0.019	0.02	0.019	0.02	0.019	0.023	0.024	0.077	0.115	0.094	0.062	0.087	0.067	0.06	0.048	0.029	0.095	0.1	0.09	0.083	0.039	0.023	0.018	0.02
46	104	46	c	0.028	0.034	0	0	0	0	0	0	0	0.067	0.069	0.012	0	0.056	0.059	0.032	0	0.037	0.059	0.024	0.04	0.018	0	0
47	39	47	c	0.095	0.087	0.09	0.077	0.091	0.078	0.1	0.072	0.09	0.067	0.087	0.078	0.08	0.087	0.623	0.312	0.489	1.02	0.384	0.344	0.306	0.207	0.19	0.246
48	39	48	c	0	0	0	0	0	0	0	0	0	0	0	0	0	0	0	0	0	0	0	0	0	0	0	0
49	105	49	c	0.1	0.128	0.107	0.066	0.06	0.1	0.059	0.113	0.172	0.203	0.378	0.337	0.265	0.166	0.461	0.255	0.299	0.345	0.281	0.224	0.159	0.138	0.15	0.126
50	40	50	c	0.049	0.046	0.045	0.043	0.006	0.005	0.005	0.005	0.021	0.032	0.048	0.046	0.045	0.023	0.005	0.005	0.008	0.014	0.063	0.08	0.078	0.066	0.038	0.04
51	40	51	c	0.094	0.037	0.073	0.072	0.024	0.023	0.023	0.023	0.021	0.022	0.047	0.022	0.021	0.068	0.066	0.064	0.107	0.026	0.13	0.154	0.13	0.031	0.031	0.024
52	106	52	c	0	0	0	0	0	0	0	0	0	0	0	0	0	0	0	0	0	0	0	0	0	0	0	0
53	42	53	b	0	0	0	0	0	0	0	0	0	0	0	0	0	0	0	0	0	0	0	0	0	0	0	0
54	42	54	b	0	0	0	0	0	0	0	0	0	0	0	0	0	0	0	0	0	0	0	0	0	0	0	0
55	43	55	a	0	0	0	0	0	0	0	0	0	0	0	0	0	0	0	0	0	0	0	0	0	0	0	0
56	43	56	c	0.07	0.069	0.068	0.068	0.067	0.067	0.02	0.095	0.038	0.104	0.099	0.081	0.058	0.126	0.113	0.088	0.005	0.042	0.131	0.117	0.114	0.111	0.078	0.056
57	44	57	b	0.121	0.118	0.119	0.121	0.121	0.106	0.113	0.118	0.167	0.135	0.138	0.16	0.104	0.099	0.107	0.112	0.103	0.121	0.173	0.104	0.099	0.094	0.111	0.112
58	44	58	b	0.171	0.152	0.145	0.163	0.183	0.185	0.183	0.14	0.127	0.105	0.13	0.141	0.129	0.143	0.147	0.157	0.145	0.241	0.302	0.355	0.31	0.268	0.242	0.213
59	44	59	c	0	0	0	0	0	0	0	0	0	0	0	0	0	0	0	0	0	0	0	0	0	0	0	0
60	107	60	b	0.107	0.058	0.096	0.059	0.095	0.058	0.093	0.082	0.128	0.115	0.153	0.049	0.042	0	0.04	0.067	0.142	0.107	0.162	0.194	0.142	0.099	0.13	0.037
61	45	61	a	0	0	0	0	0	0	0	0	0	0	0	0	0	0	0	0	0	0	0	0	0	0	0	0
62	45	62	a	0.003	0.002	0.002	0.001	0.002	0.003	0.034	0.068	0.075	0.062	0.014	0.003	0.003	0.001	0	0.001	0.004	0.005	0.025	0.106	0.055	0.001	0.002	0.002
63	108	63	b	0.02828	0.02588	0.02594	0.02367	0.0244	0.02886	0.03499	0.04293	0.04351	0.04708	0.04824	0.04421	0.04419	0.04881	0.04522	0.05107	0.04265	0.04658	0.05269	0.05171	0.05372	0.06037	0.0414	0.0436
64	46	64	b	0.109	0.097	0.093	0.105	0.117	0.118	0.117	0.09	0.082	0.067	0.083	0.091	0.082	0.092	0.094	0.1	0.093	0.154	0.193	0.227	0.198	0.172	0.155	0.136
65	109	65	a	0	0	0	0	0	0	0	0	0	0	0	0	0	0	0	0	0	0	0	0	0	0	0	0
66	109	66	a	0	0	0	0	0	0	0	0	0	0	0	0	0	0	0	0	0	0	0	0	0	0	0	0
67	47	67	c	0.03577	0.03375	0.03247	0.03241	0.02991	0.03261	0.03585	0.04363	0.04657	0.04852	0.0508	0.04862	0.04738	0.04689	0.04779	0.04911	0.0331	0.03499	0.0419	0.04566	0.04526	0.05099	0.03999	0.04606
68	48	68	b	0.046	0.041	0.04	0.045	0.05	0.05	0.05	0.038	0.035	0.029	0.035	0.039	0.035	0.039	0.04	0.043	0.04	0.066	0.082	0.097	0.084	0.073	0.066	0.058
69	48	69	b	0.03	0.027	0.026	0.029	0.033	0.033	0.033	0.025	0.023	0.019	0.023	0.025	0.023	0.026	0.026	0.028	0.026	0.043	0.054	0.063	0.055	0.048	0.043	0.038
70	110	70	b	0.082	0.073	0.07	0.079	0.088	0.089	0.088	0.068	0.061	0.051	0.063	0.068	0.062	0.069	0.071	0.075	0.07	0.116	0.145	0.171	0.149	0.129	0.117	0.102
71	49	71	b	0.067	0.059	0.057	0.064	0.072	0.072	0.072	0.055	0.05	0.041	0.051	0.055	0.05	0.056	0.057	0.061	0.057	0.094	0.118	0.139	0.121	0.105	0.095	0.083
72	111	72	c	0.038	0.062	0.038	0.037	0.034	0.032	0.044	0.148	0.162	0.152	0.083	0.084	0.146	0.117	0.163	0.112	0.15	0.154	0.112	0.142	0.084	0.075	0.049	0.051
73	111	73	c	0.018	0.032	0.018	0.086	0.086	0.019	0.03	0.063	0.059	0.193	0.11	0.019	0.024	0.122	0.23	0.928	0.253	0.065	0.097	0.15	0.091	0.036	0.023	0.066
74	52	74	c	0.052	0.052	0.072	0.052	0.064	0.221	0.158	0.061	0.131	0.169	0.185	0.188	0.184	0.203	0.205	0.188	0.127	0.209	0.222	0.202	0.186	0.143	0.069	0.045
75	55	75	a	0	0	0	0	0	0	0	0	0	0	0	0	0	0	0	0	0	0	0	0	0	0	0.001	0
76	112	76	b	0	0	0	0	0	0	0	0	0	0	0	0	0	0	0	0	0	0	0	0	0	0	0	0
77	56	77	a	0.112	0.072	0.058	0.088	0.039	0.109	0.698	0.392	0.079	0.057	1.225	1.343	1.418	1.379	0.21	0.584	0.354	1.256	1.195	0.976	0.222	0.205	0.222	0.148
78	113	78	b	0.03	0.028	0.028	0.026	0.023	0.007	0.083	0.069	0.069	0.069	0.054	0.024	0.019	0.014	0.026	0.026	0.029	0.078	0.077	0.131	0.071	0.072	0.069	0.027
79	58	79	a	0	0	0	0	0	0.01	0.044	0.013	0.004	0.001	0.001	0.001	0.002	0.002	0.002	0.001	0.008	0.014	0.012	0	0	0	0	0
80	58	80	a	0.1	0.136	0.083	0.057	0.103	0.141	0.259	0.054	0.047	0.063	0.082	0.176	0.067	0.041	0.111	0.153	0.136	0.154	0.22	0.34	0.237	0.161	0.099	0.052
81	58	81	a	0.0066	0.0058	0.0056	0.0063	0.007	0.0071	0.007	0.0054	0.0049	0.004	0.005	0.0054	0.0049	0.0055	0.0056	0.006	0.0056	0.0093	0.0116	0.0136	0.0119	0.0103	0.0093	0.0082
82	62	82	a	0.003	0.016	0.006	0	0.022	0	0.013	0.014	0.048	0.045	0.039	0.019	0.029	0.042	0.093	0.083	0.079	0.02	0.119	0.166	0.015	0.049	0.016	0.014
83	63	83	b	0.261	0.21	0.276	0.198	0.267	0.24	0.273	0.414	0.315	0.243	0.117	0.159	0.159	0.138	0.384	0.405	0.522	0.393	0.372	0.306	0.54	0.258	0.174	0.114
84	65	84	a	0.021	0.021	0.022	0.021	0.02	0.02	0.02	0.109	0.052	0.065	0.189	0.25	0.172	0.118	0.134	0.191	0.254	0.358	0.385	0.29	0.16	0.072	0.046	0.025
85	66	85	a	0.0032	0.0028	0.0027	0.003	0.0034	0.0034	0.0034	0.0026	0.0024	0.0019	0.0024	0.0026	0.0024	0.0027	0.0027	0.0029	0.0027	0.0045	0.0056	0.0066	0.0057	0.005	0.0045	0.0039
86	66	86	b	0.03577	0.03375	0.03247	0.03241	0.02991	0.03261	0.03585	0.04363	0.04657	0.04852	0.0508	0.04862	0.04738	0.04689	0.04779	0.04911	0.0331	0.03499	0.0419	0.04566	0.04526	0.05099	0.03999	0.04606
87	114	87	b	0.136	0.121	0.116	0.13	0.146	0.147	0.146	0.112	0.102	0.084	0.104	0.113	0.103	0.114	0.117	0.125	0.116	0.192	0.241	0.283	0.247	0.214	0.193	0.17
88	68	88	a	0.0095	0.0084	0.0081	0.0091	0.0102	0.0103	0.0102	0.0078	0.0071	0.0058	0.0072	0.0079	0.0071	0.008	0.0082	0.0087	0.0081	0.0134	0.0168	0.0197	0.0172	0.0149	0.0135	0.0118
89	68	89	a	0.087	0.064	0.073	0.061	0.056	0.057	0.088	0.19	0.21	0.172	0.21	0.094	0.12	0.226	0.231	0.152	0.144	0.224	0.272	0.244	0.182	0.155	0.144	0.097
90	115	90	b	0.039	0.035	0.033	0.037	0.042	0.042	0.042	0.032	0.029	0.024	0.03	0.032	0.029	0.033	0.033	0.036	0.033	0.055	0.069	0.081	0.07	0.061	0.055	0.048
91	70	91	b	0.042	0.037	0.05	0.041	0.075	0.11	0.164	0.094	0.071	0.092	0.083	0.055	0.055	0.067	0.648	0.168	0.282	0.125	0.093	0.137	0.097	0.089	0.051	0.049
92	71	92	a	0.0138	0.0123	0.0118	0.0133	0.0149	0.015	0.0149	0.0114	0.0103	0.0085	0.0106	0.0115	0.0105	0.0116	0.0119	0.0127	0.0118	0.0196	0.0245	0.0288	0.0251	0.0218	0.0197	0.0173
93	71	93	a	0	0	0	0	0	0	0	0	0	0	0	0	0	0	0	0	0	0	0	0	0	0	0	0
94	119	94	b	1.416	1.399	1.418	1.414	1.412	1.419	0.74	0.756	0.77	0.747	0.865	0.76	0.209	0.181	0.191	0.287	0.386	0.364	0.431	0.46	0.431	0.524	1.417	1.408
95	119	95	b	0	0	0	0	0	0	0	0	0	0	0	0	0	0	0	0	0	0	0	0	0	0	0.001	0
96	120	96	a	0.085	0.011	0.011	0.132	0.229	0.041	0.039	0.115	0.109	0.041	0.113	0.004	0.015	0.055	0.032	0.035	0.047	0.046	0.051	0.096	0.054	0.037	0.108	0.039
97	75	97	a	0	0	0	0	0	0	0	0	0	0	0	0	0	0	0	0	0	0	0	0	0	0	0	0
98	76	98	b	0.058	0.052	0.049	0.056	0.062	0.063	0.062	0.048	0.043	0.036	0.044	0.048	0.044	0.049	0.05	0.053	0.049	0.082	0.103	0.121	0.105	0.091	0.082	0.072
99	121	99	a	0.071	0.12	0.093	0.052	0.056	0.132	0.076	0.016	0.04	0.072	0.032	0.001	0.027	0.12	0.052	0	0.004	0.08	0.076	0.113	0.213	0.245	0.067	0.052
100	78	100	c	0	0	0	0	0	0	0	0	0	0	0	0	0	0	0	0	0	0	0	0	0	0	0	0
101	78	101	a	0.0328	0.0292	0.0279	0.0314	0.0352	0.0355	0.0352	0.027	0.0245	0.0202	0.025	0.0272	0.0247	0.0275	0.0282	0.0301	0.0279	0.0463	0.058	0.0682	0.0595	0.0515	0.0466	0.0409
102	116	102	a	0.004	0.004	0.041	0.004	0.004	0.004	0.004	0.004	0.004	0.011	0.014	0.05	0.006	0.042	0.06	0.035	0.004	0.033	0.061	0.056	0.004	0.004	0.004	0.058
103	117	103	c	0	0	0	0	0	0	0	0	0	0	0	0	0	0	0	0	0	0	0	0	0	0	0	0
104	80	104	c	0	0	0	0	0	0	0	0	0	0	0	0	0	0	0	0	0	0	0	0	0	0	0	0
105	81	105	c	0.046	0.113	0.046	0.049	0.044	0.043	0.043	0.042	0.097	0.107	0.116	0.109	0.067	0.046	0.045	0.101	0.151	0.19	0.187	0.111	0.109	0.113	0.057	0.042
106	84	106	a	0	0	0	0	0	0	0	0	0	0	0	0	0	0	0	0	0	0	0	0	0	0	0	0
107	85	107	a	0.384	0.463	0.2	0.26	0.208	0.145	0.278	0.822	0.533	0.312	0.608	0.647	0.808	2.084	1.961	2.606	2.215	0.939	1.64	1.859	1.823	0.697	0.551	0.248
108	86	108	a	0.028	0.036	0.029	0.037	0.029	0.034	0.033	0.03	0.033	0.034	0.029	0.029	0.03	0.031	0.031	0.028	0.027	0.027	0.024	0.027	0.027	0.027	0.02	0.027
109	86	109	a	0.096	0.095	0.095	0.096	0.097	0.094	0.093	0.093	0.087	0.088	0.096	0.091	0.098	0.103	0.096	0.093	0.097	0.085	0.081	0.08	0.086	0.093	0.087	0.091
110	88	110	a	0.02	0.004	0.004	0.005	0.004	0.004	0.004	0.039	0.07	0.145	0.168	0.154	0.216	0.142	0.244	0.244	0.248	0.228	0.219	0.232	0.269	0.208	0.091	0.123
111	89	111	a	0.1796	0.1598	0.1529	0.1722	0.193	0.1944	0.193	0.1479	0.1341	0.1108	0.1371	0.1489	0.1356	0.1509	0.1549	0.1653	0.1529	0.2538	0.3181	0.374	0.3261	0.2825	0.2553	0.2241
112	90	112	a	0.012	0.001	0	0	0.005	0.026	0.121	0.16	0.928	0.975	0.135	0.05	0.027	0.028	0.009	0.008	0	0.045	0.06	0.042	0.014	0.01	0.007	0
113	90	113	a	0	0	0	0	0	0	0	0	0	0	0	0	0	0	0	0	0	0	0	0	0	0	0	0

## Sheet: Prosumer data
				Generation, kWh
No.	Pole index	Prosumer code	Connection phase	h01	h02	h03	h04	h05	h06	h07	h08	h09	h10	h11	h12	h13	h14	h15	h16	h17	h18	h19	h20	h21	h22	h23	h24
1	18	12	c	0	0	0	0	0	1.071	1.214	1.372	1.379	1.484	1.52	1.513	1.534	1.517	1.425	1.225	1.094	1.041	0	0	0	0	0	0
2	27	28	a	0	0	0	0	0	0.67	0.71	0.786	0.864	0.989	1.115	1.169	1.315	1.099	0.998	0.847	0.784	0.597	0	0	0	0	0	0
3	37	44	c	0	0	0	0	0	0.787	0.928	1.095	1.11	1.213	1.25	1.245	1.271	1.247	1.154	0.944	0.801	0.746	0	0	0	0	0	0
4	39	47	c	0	0	0	0	0	0.728	0.876	1.082	1.146	1.214	1.275	1.213	1.288	1.268	1.164	0.959	0.768	0.702	0	0	0	0	0	0
5	56	77	a	0	0	0	0	0	1.458	1.608	1.795	1.775	1.891	1.923	1.881	1.942	1.901	1.784	1.547	1.425	1.367	0	0	0	0	0	0
6	63	83	b	0	0	0	0	0	0.083	0.173	0.335	0.527	0.578	0.62	0.638	0.661	0.585	0.521	0.305	0.165	0.103	0	0	0	0	0	0
7	119	94	b	0	0	0	0	0	0.988	1.121	1.307	1.365	1.426	1.481	1.425	1.492	1.474	1.381	1.196	1.025	0.965	0	0	0	0	0	0
8	85	107	a	0	0	0	0	0	1.357	1.536	1.647	1.689	1.781	1.806	1.773	1.835	1.825	1.636	1.448	1.339	1.286	0	0	0	0	0	0
